# Supplementary material for: Spectral Complexity of Hyperspectral Images: A New Approach for Mangrove Classification
Source: MDPI journal article supplement (doi:10.3390/rs13132604), 2021-07-02
Supplement: s1 [file s1]

**Table S1:** Sample ATCOR-4r (rugged terrain) settings used to process the first CASI HSI of flight line. Visibility, atmospheric profile and aerosol model were consistent for all flight lines.

| Parameter                     | Input Value |
|-------------------------------|-------------|
| Flight date (dd-mm-yyyy)      | 29-04-2013  |
| Flight time (hh:mm:ss)        | 14:07:14    |
| Flight altitude (km asl)      | 2.469       |
| Average ground elevation (km) | 0.047       |
| Flight heading (degree)       | 122.8       |
| Solar zenith angle (degree)   | 50.1        |
| Solar azimuth angle (degree)  | 78.4        |
| Visibility (km)               | 100         |
| Atmospheric profile           | Tropical    |
| Aerosol model                 | Maritime    |

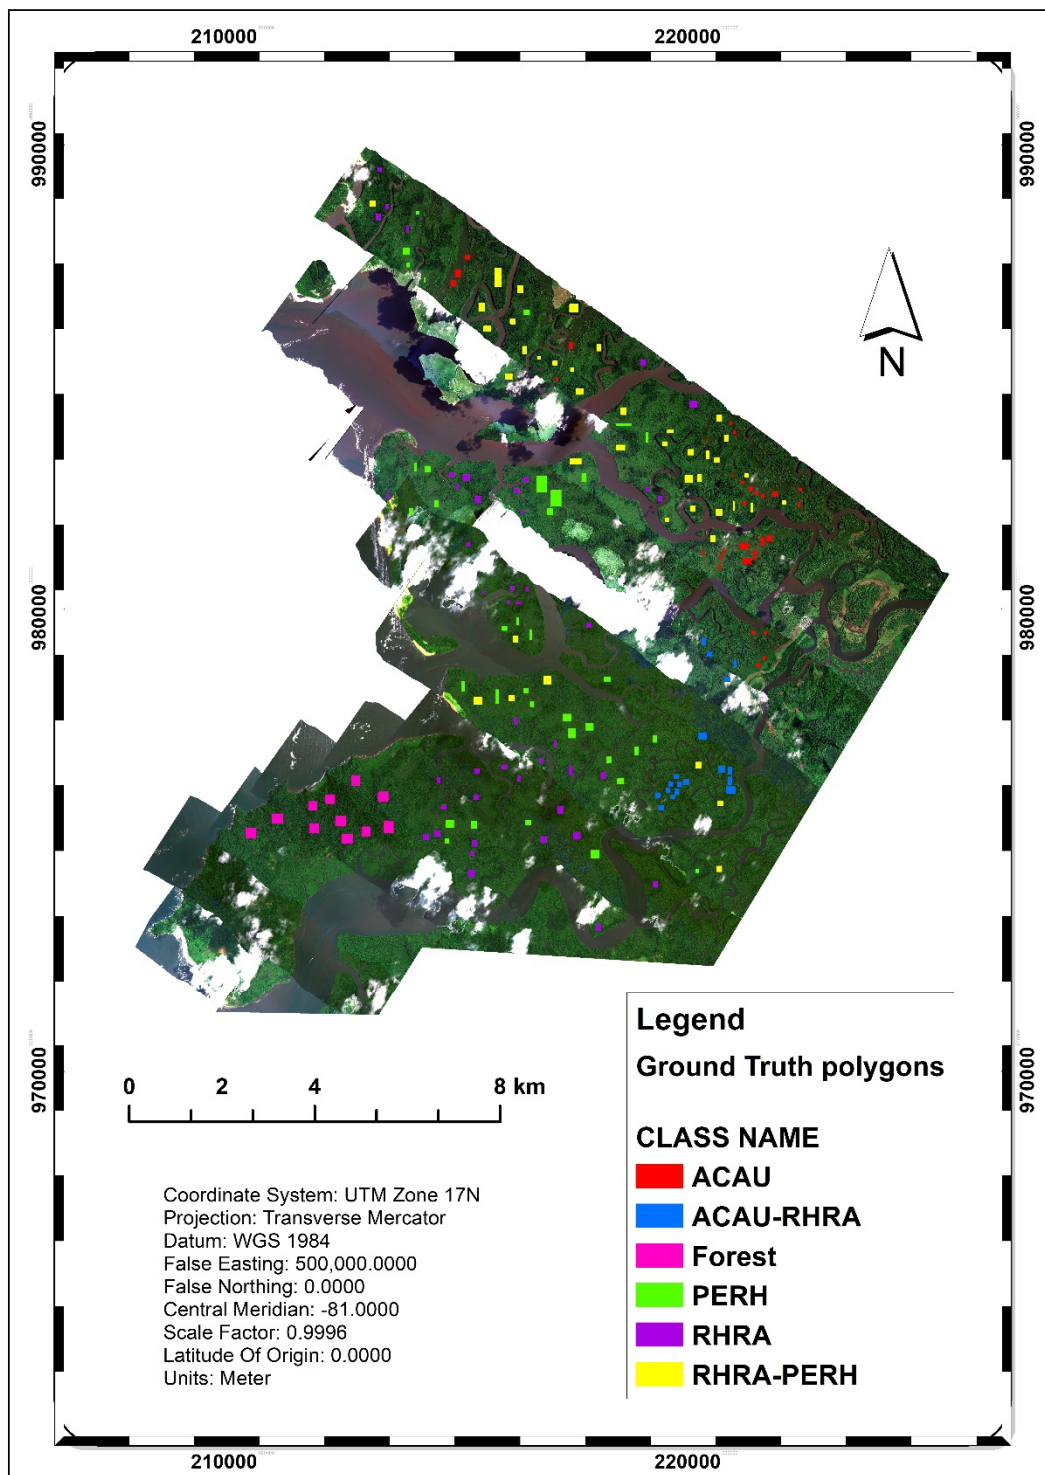

**Figure S1:** Spatial distribution of ground truth polygons used in this study, 181 polygons made up of ACAU (31 polygons), ACAU-RHRA (18 Polygons), Forest (11 polygons), PERH (36 polygons), RHRA (44 polygons) and RHRA-PERH (41 polygons)

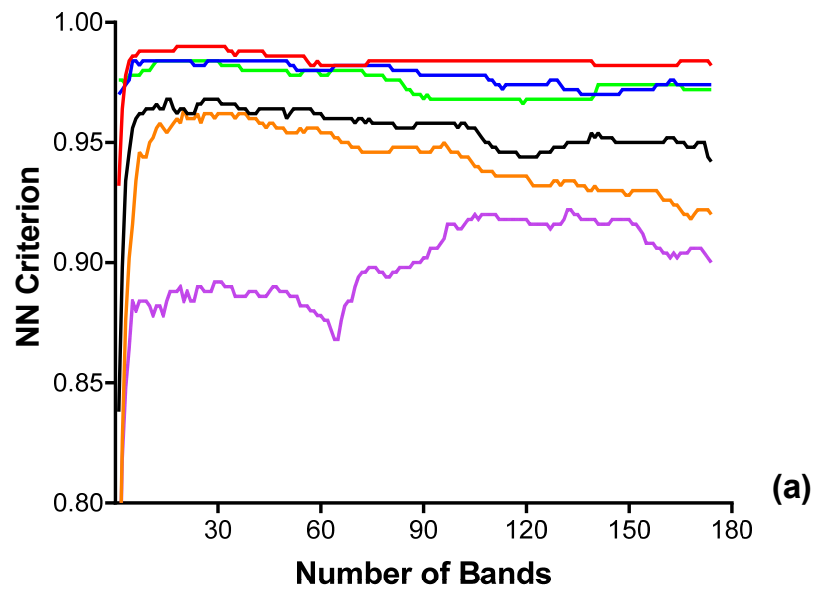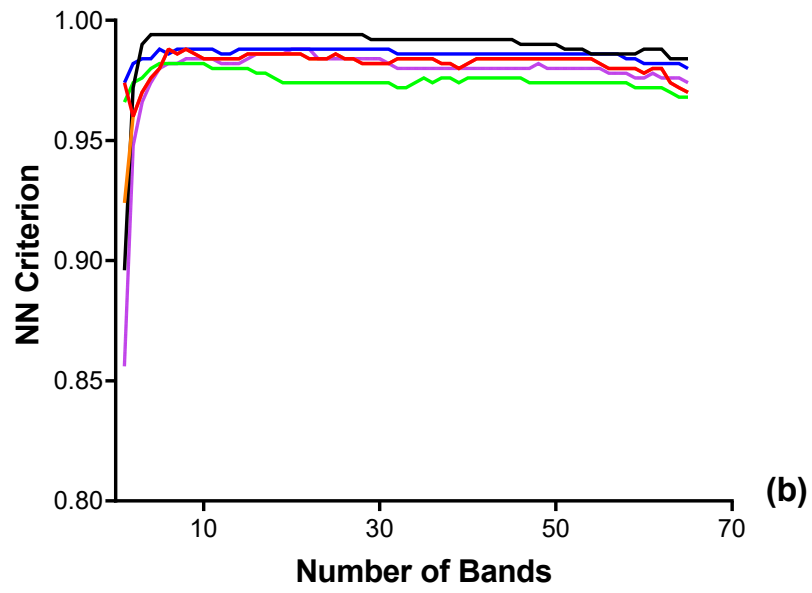

— ME - SWIR (500 m)    — MIG - SWIR (250 m)    — MIG - SWIR (62.5 m)  
— MIG - SWIR (500 m)    — ME - SWIR (250)    — ME - SWIR (62.5 m)

**Figure S2:** Forward Feature Selection implemented on different window sizes (i.e., 62.5 m, 250 m, 500 m) for mangrove extent classification.

|            |           | Predicted Class |           |        |      |      |           | UA (%) | Overall Accuracy (%) = <b>84.5</b> |
|------------|-----------|-----------------|-----------|--------|------|------|-----------|--------|------------------------------------|
|            |           | ACAU            | ACAU-RHRA | Forest | PERH | RHRA | RHRA-PERH |        |                                    |
| True Class | ACAU      | 62              |           |        |      |      |           | 100.0  |                                    |
|            | ACAU-RHRA |                 | 57        | 1      | 3    |      | 2         | 90.5   |                                    |
|            | Forest    |                 | 1         | 55     |      | 2    | 4         | 88.7   |                                    |
|            | PERH      | 1               |           |        | 53   | 5    | 3         | 85.5   |                                    |
|            | RHRA      |                 | 5         | 1      | 3    | 37   | 17        | 58.7   |                                    |
|            | RHRA-PERH |                 |           |        | 3    | 7    | 53        | 84.1   |                                    |
| PA (%)     |           | 98.4            | 90.5      | 96.5   | 85.5 | 72.5 | 67.1      |        |                                    |

**Figure S3:** Confusion matrix showing the best classification performance attained for ME (SWIR) at 25 m spatial resolution using Q-SVM classifier.

|            |           | Predicted Class |           |        |      |      |           | UA (%) | Overall Accuracy (%) = <b>80.0</b> |
|------------|-----------|-----------------|-----------|--------|------|------|-----------|--------|------------------------------------|
|            |           | ACAU            | ACAU-RHRA | Forest | PERH | RHRA | RHRA-PERH |        |                                    |
| True Class | ACAU      | 56              | 1         | 1      | 3    |      | 1         | 90.3   |                                    |
|            | ACAU-RHRA | 1               | 54        | 7      |      | 1    |           | 85.7   |                                    |
|            | Forest    | 2               | 4         | 49     |      | 5    | 3         | 77.8   |                                    |
|            | PERH      |                 |           |        | 61   |      | 1         | 98.4   |                                    |
|            | RHRA      |                 | 2         | 2      | 2    | 34   | 22        | 54.8   |                                    |
|            | RHRA-PERH | 1               |           | 1      | 3    | 12   | 46        | 73.0   |                                    |
| PA (%)     |           | 93.3            | 88.5      | 81.7   | 88.4 | 65.4 | 63.0      |        |                                    |

**Figure S4:** Confusion matrix showing the best classification performance attained for spatially resampled VNIR reflectance (25 m) using Q-SVM classifier.

|            |           | Predicted Class |           |        |      |      |           | Overall Accuracy (%) = <b>86.0</b> |        |
|------------|-----------|-----------------|-----------|--------|------|------|-----------|------------------------------------|--------|
| True Class |           | ACAU            | ACAU-RHRA | Forest | PERH | RHRA | RHRA-PERH |                                    | UA (%) |
|            | ACAU      | 125             |           |        |      |      |           |                                    | 100.0  |
|            | ACAU-RHRA |                 | 119       | 6      |      |      |           |                                    | 95.2   |
|            | Forest    |                 | 2         | 114    |      | 5    | 4         |                                    | 91.2   |
|            | PERH      |                 |           |        | 110  | 3    | 12        |                                    | 88.0   |
|            | RHRA      | 1               |           | 1      | 3    | 79   | 41        |                                    | 63.2   |
| RHRA-PERH  | 1         | 2               |           | 7      | 17   | 98   | 78.4      |                                    |        |
| PA (%)     |           | 98.4            | 96.7      | 94.2   | 91.7 | 76.0 | 63.2      |                                    |        |

**Figure S5:** Confusion matrix showing the best classification performance attained for spatially resampled VNIR reflectance (12.5 m) using Q-SVM classifier.

|            |           | Predicted Class |           |        |      |      |           |        |                                    |
|------------|-----------|-----------------|-----------|--------|------|------|-----------|--------|------------------------------------|
|            |           | ACAU            | ACAU-RHRA | Forest | PERH | RHRA | RHRA-PERH | UA (%) |                                    |
| True Class | ACAU      | 21              | 1         |        | 1    |      |           | 91.3   | Overall Accuracy (%) = <b>67.1</b> |
|            | ACAU-RHRA |                 | 4         |        | 4    | 11   | 5         | 16.7   |                                    |
|            | Forest    |                 | 2         | 24     | 1    |      | 1         | 85.7   |                                    |
|            | PERH      |                 |           |        | 29   | 2    |           | 93.5   |                                    |
|            | RHRA      |                 | 2         |        | 4    | 10   | 13        | 34.5   |                                    |
|            | RHRA-PERH | 1               | 2         |        | 6    | 2    | 30        | 73.2   |                                    |
| PA (%)     |           | 95.5            | 36.4      | 100.0  | 64.4 | 40.0 | 61.2      |        | <b>(a)</b>                         |

|            |           | Predicted Class |           |        |      |      |           |        |                                    |
|------------|-----------|-----------------|-----------|--------|------|------|-----------|--------|------------------------------------|
|            |           | ACAU            | ACAU-RHRA | Forest | PERH | RHRA | RHRA-PERH | UA (%) |                                    |
| True Class | ACAU      | 14              |           | 4      | 3    |      | 2         | 60.9   | Overall Accuracy (%) = <b>57.1</b> |
|            | ACAU-RHRA |                 | 6         | 1      | 3    | 9    | 5         | 25.0   |                                    |
|            | Forest    | 1               | 2         | 21     | 1    |      | 3         | 75.0   |                                    |
|            | PERH      |                 |           |        | 26   | 4    | 1         | 83.9   |                                    |
|            | RHRA      |                 | 3         | 1      | 1    | 11   | 13        | 37.9   |                                    |
|            | RHRA-PERH | 1               | 2         | 4      | 6    | 5    | 22        | 55.0   |                                    |
| PA (%)     |           | 87.5            | 46.2      | 67.7   | 65.0 | 37.9 | 47.8      |        | <b>(b)</b>                         |

|            |           | Predicted Class |           |        |      |      |           |        |                                    |
|------------|-----------|-----------------|-----------|--------|------|------|-----------|--------|------------------------------------|
|            |           | ACAU            | ACAU-RHRA | Forest | PERH | RHRA | RHRA-PERH | UA (%) |                                    |
| True Class | ACAU      | 18              |           | 4      |      |      | 1         | 78.3   | Overall Accuracy (%) = <b>63.6</b> |
|            | ACAU-RHRA | 1               | 7         | 1      | 1    | 9    | 6         | 28.0   |                                    |
|            | Forest    | 1               |           | 24     |      | 2    | 1         | 85.7   |                                    |
|            | PERH      |                 |           |        | 27   | 2    | 2         | 87.1   |                                    |
|            | RHRA      |                 | 2         |        | 3    | 13   | 11        | 44.8   |                                    |
|            | RHRA-PERH | 1               | 2         |        | 6    | 8    | 23        | 57.5   |                                    |
| PA (%)     |           | 85.7            | 63.6      | 82.8   | 73.0 | 38.2 | 52.3      |        | <b>(c)</b>                         |

**Figure S6:** Confusion matrix showing the classification performance of three classifiers at 62.5 m spatial resolution (a) LDA, (b) k-NN, and (c) Q-SVM trained with spatially resampled reflectance data (VNIR).

|            |           | Predicted Class |           |        |      |      |           | Overall Accuracy (%) = 54.7 |
|------------|-----------|-----------------|-----------|--------|------|------|-----------|-----------------------------|
|            |           | ACAU            | ACAU-RHRA | Forest | PERH | RHRA | RHRA-PERH |                             |
| True Class | ACAU      | 4               | 3         | 8      | 6    | 2    |           | 17.4                        |
|            | ACAU-RHRA | 3               | 10        | 4      | 1    | 2    | 2         | 45.5                        |
|            | Forest    | 1               |           | 28     |      |      |           | 96.6                        |
|            | PERH      | 1               |           |        | 20   | 1    | 3         | 80.0                        |
|            | RHRA      |                 | 3         |        | 9    | 3    | 10        | 12.0                        |
|            | RHRA-PERH |                 | 4         | 2      | 2    | 5    | 22        | 62.9                        |
| PA (%)     |           | 44.4            | 50.0      | 66.7   | 52.6 | 23.1 | 59.5      |                             |

(a)

|            |           | Predicted Class |           |        |      |      |           | Overall Accuracy (%) = 49.1 |
|------------|-----------|-----------------|-----------|--------|------|------|-----------|-----------------------------|
|            |           | ACAU            | ACAU-RHRA | Forest | PERH | RHRA | RHRA-PERH |                             |
| True Class | ACAU      | 7               | 3         | 7      | 4    | 2    |           | 30.4                        |
|            | ACAU-RHRA | 3               | 4         | 2      | 4    | 5    | 4         | 18.2                        |
|            | Forest    | 1               | 2         | 24     | 1    |      | 1         | 82.8                        |
|            | PERH      | 1               |           | 1      | 15   | 7    | 1         | 60.0                        |
|            | RHRA      |                 | 2         | 3      | 3    | 10   | 7         | 40.0                        |
|            | RHRA-PERH | 1               | 1         | 1      | 6    | 8    | 18        | 51.4                        |
| PA (%)     |           | 53.8            | 33.3      | 63.2   | 45.5 | 31.3 | 58.1      |                             |

(b)

|            |           | Predicted Class |           |        |      |      |           | Overall Accuracy (%) = 53.5 |
|------------|-----------|-----------------|-----------|--------|------|------|-----------|-----------------------------|
|            |           | ACAU            | ACAU-RHRA | Forest | PERH | RHRA | RHRA-PERH |                             |
| True Class | ACAU      | 11              | 1         | 6      | 4    | 1    |           | 47.8                        |
|            | ACAU-RHRA | 4               | 7         | 1      | 2    | 2    | 6         | 31.8                        |
|            | Forest    | 1               | 2         | 24     | 1    |      | 1         | 82.8                        |
|            | PERH      | 1               |           | 1      | 17   | 5    | 1         | 68.0                        |
|            | RHRA      |                 | 2         | 3      | 5    | 8    | 7         | 32.0                        |
|            | RHRA-PERH | 1               | 2         |        | 6    | 8    | 18        | 51.4                        |
| PA (%)     |           | 61.1            | 50.0      | 68.6   | 48.6 | 33.3 | 54.5      |                             |

(c)

**Figure S7:** Confusion matrix showing the classification performance of three classifiers at 62.5 m spatial resolution (a) LDA, (b) k-NN, and (c) Q-SVM trained with spatially resampled reflectance data (SWIR).

|            |           | Predicted Class |           |        |      |      |           | UA (%) |                                    |
|------------|-----------|-----------------|-----------|--------|------|------|-----------|--------|------------------------------------|
|            |           | ACAU            | ACAU-RHRA | Forest | PERH | RHRA | RHRA-PERH |        |                                    |
| True Class | ACAU      | 17              |           |        | 6    |      |           | 73.9   | Overall Accuracy (%) = <b>75.6</b> |
|            | ACAU-RHRA |                 | 15        |        | 1    | 6    | 3         | 60.0   |                                    |
|            | Forest    |                 |           | 27     |      | 1    |           | 96.4   |                                    |
|            | PERH      | 1               | 1         |        | 27   |      | 2         | 87.1   |                                    |
|            | RHRA      |                 | 2         | 2      |      | 23   | 2         | 79.3   |                                    |
|            | RHRA-PERH |                 | 2         |        | 4    | 10   | 24        | 60.0   |                                    |
| PA (%)     |           | 94.4            | 75.0      | 93.1   | 71.1 | 57.5 | 77.4      |        | <b>(a)</b>                         |

|            |           | Predicted Class |           |        |      |      |           | UA (%) |                                    |
|------------|-----------|-----------------|-----------|--------|------|------|-----------|--------|------------------------------------|
|            |           | ACAU            | ACAU-RHRA | Forest | PERH | RHRA | RHRA-PERH |        |                                    |
| True Class | ACAU      | 20              |           |        | 2    |      | 1         | 87.0   | Overall Accuracy (%) = <b>81.3</b> |
|            | ACAU-RHRA |                 | 17        |        | 1    | 2    | 5         | 68.0   |                                    |
|            | Forest    |                 |           | 28     |      |      |           | 100.0  |                                    |
|            | PERH      |                 | 2         |        | 27   |      | 2         | 87.1   |                                    |
|            | RHRA      |                 | 3         |        |      | 21   | 5         | 72.4   |                                    |
|            | RHRA-PERH |                 | 2         |        | 1    | 7    | 30        | 75.0   |                                    |
| PA (%)     |           | 100.0           | 70.8      | 100.0  | 87.1 | 70.0 | 69.8      |        | <b>(b)</b>                         |

|            |           | Predicted Class |           |        |      |      |           | UA (%) |                                    |
|------------|-----------|-----------------|-----------|--------|------|------|-----------|--------|------------------------------------|
|            |           | ACAU            | ACAU-RHRA | Forest | PERH | RHRA | RHRA-PERH |        |                                    |
| True Class | ACAU      | 20              |           |        | 2    |      | 1         | 87.0   | Overall Accuracy (%) = <b>79.0</b> |
|            | ACAU-RHRA |                 | 15        |        | 3    | 1    | 6         | 60.0   |                                    |
|            | Forest    |                 |           | 28     |      |      |           | 100.0  |                                    |
|            | PERH      | 1               | 1         |        | 25   |      | 4         | 80.6   |                                    |
|            | RHRA      |                 | 3         |        |      | 21   | 5         | 72.4   |                                    |
|            | RHRA-PERH |                 | 4         |        | 1    | 5    | 30        | 75.0   |                                    |
| PA (%)     |           | 95.2            | 65.2      | 100.0  | 80.6 | 77.8 | 65.2      |        | <b>(c)</b>                         |

**Figure S8:** Confusion matrix showing the classification performance of three classifiers at 62.5 m spatial resolution (a) LDA, (b) k-NN, and (c) Q-SVM trained with ME transformed reflectance (VNIR).



|            |           | Predicted Class |           |        |      |      |           | Overall Accuracy (%) = <b>71.6</b> |
|------------|-----------|-----------------|-----------|--------|------|------|-----------|------------------------------------|
| True Class |           | ACAU            | ACAU-RHRA | Forest | PERH | RHRA | RHRA-PERH |                                    |
|            | ACAU      | 14              |           | 1      | 4    | 3    |           | 63.6                               |
|            | ACAU-RHRA | 2               | 12        | 3      |      |      | 5         | 54.5                               |
|            | Forest    |                 |           | 22     |      |      | 7         | 75.9                               |
|            | PERH      |                 |           |        | 23   | 3    |           | 88.5                               |
|            | RHRA      | 1               |           | 3      | 3    | 12   | 6         | 48.0                               |
|            | RHRA-PERH |                 | 2         | 1      |      | 2    | 33        | 86.8                               |
| PA (%)     |           | 82.4            | 85.7      | 73.3   | 76.7 | 60.0 | 64.7      |                                    |

**(a)**

|            |           | Predicted Class |           |        |      |      |           | Overall Accuracy (%) = <b>77.8</b> |
|------------|-----------|-----------------|-----------|--------|------|------|-----------|------------------------------------|
| True Class |           | ACAU            | ACAU-RHRA | Forest | PERH | RHRA | RHRA-PERH |                                    |
|            | ACAU      | 16              |           | 1      | 4    | 1    |           | 72.7                               |
|            | ACAU-RHRA |                 | 15        | 3      | 2    |      | 2         | 68.2                               |
|            | Forest    |                 |           | 25     |      |      | 4         | 86.2                               |
|            | PERH      |                 |           |        | 25   | 1    |           | 96.2                               |
|            | RHRA      |                 |           | 3      | 3    | 11   | 8         | 44.0                               |
|            | RHRA-PERH |                 |           | 3      |      | 1    | 34        | 89.5                               |
| PA (%)     |           | 100.0           | 100.0     | 71.4   | 73.5 | 78.6 | 70.8      |                                    |

**(b)**

|            |           | Predicted Class |           |        |      |      |           | Overall Accuracy (%) = <b>75.3</b> |
|------------|-----------|-----------------|-----------|--------|------|------|-----------|------------------------------------|
| True Class |           | ACAU            | ACAU-RHRA | Forest | PERH | RHRA | RHRA-PERH |                                    |
|            | ACAU      | 14              | 1         | 1      | 5    | 1    |           | 63.6                               |
|            | ACAU-RHRA |                 | 10        | 3      | 3    | 1    | 5         | 45.5                               |
|            | Forest    |                 |           | 27     |      |      | 2         | 93.1                               |
|            | PERH      |                 |           |        | 23   | 1    | 2         | 88.5                               |
|            | RHRA      |                 |           | 1      | 4    | 12   | 8         | 48.0                               |
|            | RHRA-PERH |                 |           | 1      | 1    |      | 36        | 94.7                               |
| PA (%)     |           | 100.0           | 90.9      | 81.8   | 63.9 | 80.0 | 67.9      |                                    |

**(c)**

**Figure S9:** Confusion matrix showing the classification performance of three classifiers at 62.5 m spatial resolution (a) LDA, (b) k-NN, and (c) Q-SVM trained with ME transformed reflectance (SWIR).

| True Class | Predicted Class |           |        |      |      |           | UA (%) |                             |
|------------|-----------------|-----------|--------|------|------|-----------|--------|-----------------------------|
|            | ACAU            | ACAU-RHRA | Forest | PERH | RHRA | RHRA-PERH |        |                             |
| ACAU       | 18              | 1         |        |      | 1    | 4         | 75.0   | Overall Accuracy (%) = 76.7 |
| ACAU-RHRA  | 3               | 14        |        | 1    | 7    |           | 56.0   |                             |
| Forest     |                 |           | 27     |      | 1    |           | 96.4   |                             |
| PERH       | 1               |           |        | 25   | 2    | 3         | 80.6   |                             |
| RHRA       |                 | 2         |        |      | 25   | 1         | 89.3   |                             |
| RHRA-PERH  |                 | 3         | 3      | 2    | 6    | 26        | 65.0   |                             |
| PA (%)     | 81.8            | 70.0      | 90.0   | 89.3 | 59.5 | 76.5      |        |                             |

(a)

| True Class | Predicted Class |           |        |       |      |           | UA (%) |                             |
|------------|-----------------|-----------|--------|-------|------|-----------|--------|-----------------------------|
|            | ACAU            | ACAU-RHRA | Forest | PERH  | RHRA | RHRA-PERH |        |                             |
| ACAU       | 22              | 1         |        |       | 1    |           | 91.7   | Overall Accuracy (%) = 85.8 |
| ACAU-RHRA  |                 | 17        |        |       | 4    | 4         | 72.7   |                             |
| Forest     |                 |           | 28     |       |      |           | 100.0  |                             |
| PERH       |                 |           |        | 30    |      | 1         | 96.2   |                             |
| RHRA       |                 | 3         |        |       | 23   | 2         | 91.3   |                             |
| RHRA-PERH  |                 | 3         |        |       | 6    | 31        | 77.1   |                             |
| PA (%)     | 100.0           | 70.8      | 100.0  | 100.0 | 67.6 | 81.6      |        |                             |

(b)

| True Class | Predicted Class |           |        |      |      |           | UA (%) |                             |
|------------|-----------------|-----------|--------|------|------|-----------|--------|-----------------------------|
|            | ACAU            | ACAU-RHRA | Forest | PERH | RHRA | RHRA-PERH |        |                             |
| ACAU       | 21              | 2         |        | 1    |      |           | 87.5   | Overall Accuracy (%) = 87.5 |
| ACAU-RHRA  |                 | 18        |        | 1    | 5    | 1         | 72.0   |                             |
| Forest     |                 |           | 27     |      |      | 1         | 96.4   |                             |
| PERH       |                 |           |        | 28   | 2    | 1         | 90.3   |                             |
| RHRA       |                 | 2         |        |      | 25   | 1         | 89.3   |                             |
| RHRA-PERH  |                 | 2         |        |      | 3    | 35        | 87.5   |                             |
| PA (%)     | 100.0           | 75.0      | 100.0  | 93.3 | 71.4 | 89.7      |        |                             |

(c)

**Figure S10:** Confusion matrix showing the classification performance of SCM at 62.5 m spatial resolution (a) LDA (b) k-NN and (c) Q-SVM trained with MIG transformed reflectance (VNIR).

|            | Predicted Class |           |        |      |      |           | UA (%) |                             |
|------------|-----------------|-----------|--------|------|------|-----------|--------|-----------------------------|
|            | ACAU            | ACAU-RHRA | Forest | PERH | RHRA | RHRA-PERH |        |                             |
| True Class | ACAU            | 12        | 1      | 4    | 5    |           | 54.5   | Overall Accuracy (%) = 64.2 |
|            | ACAU-RHRA       | 1         | 11     | 6    | 1    | 2         | 52.4   |                             |
|            | Forest          |           |        | 25   |      | 4         | 86.2   |                             |
|            | PERH            | 3         | 3      |      | 19   | 1         | 70.4   |                             |
|            | RHRA            |           |        | 3    | 4    | 13        | 50.0   |                             |
|            | RHRA-PERH       | 1         | 4      | 4    | 1    | 3         | 24     |                             |
| PA (%)     |                 | 70.6      | 61.1   | 64.1 | 65.5 | 59.1      | 64.9   | (a)                         |

|            | Predicted Class |           |        |      |      |           | UA (%) |                             |
|------------|-----------------|-----------|--------|------|------|-----------|--------|-----------------------------|
|            | ACAU            | ACAU-RHRA | Forest | PERH | RHRA | RHRA-PERH |        |                             |
| True Class | ACAU            | 18        | 1      |      | 3    |           | 81.8   | Overall Accuracy (%) = 80.2 |
|            | ACAU-RHRA       |           | 11     | 3    | 3    | 4         | 52.4   |                             |
|            | Forest          |           |        | 27   | 1    | 1         | 93.1   |                             |
|            | PERH            |           |        |      | 27   |           | 100.0  |                             |
|            | RHRA            |           |        | 1    | 17   | 8         | 65.4   |                             |
|            | RHRA-PERH       |           | 2      |      | 5    | 30        | 81.1   |                             |
| PA (%)     |                 | 100.0     | 84.6   | 87.1 | 87.1 | 65.4      | 69.8   | (b)                         |

|            | Predicted Class |           |        |      |      |           | UA (%) |                             |
|------------|-----------------|-----------|--------|------|------|-----------|--------|-----------------------------|
|            | ACAU            | ACAU-RHRA | Forest | PERH | RHRA | RHRA-PERH |        |                             |
| True Class | ACAU            | 18        | 1      |      | 2    | 1         | 81.8   | Overall Accuracy (%) = 72.2 |
|            | ACAU-RHRA       | 2         | 9      | 1    |      | 9         | 42.9   |                             |
|            | Forest          |           |        | 28   |      | 1         | 96.6   |                             |
|            | PERH            | 1         |        |      | 22   | 2         | 81.5   |                             |
|            | RHRA            |           |        | 3    | 15   | 8         | 57.7   |                             |
|            | RHRA-PERH       |           | 4      | 1    | 1    | 6         | 25     |                             |
| PA (%)     |                 | 85.7      | 69.2   | 90.3 | 84.6 | 60.0      | 54.3   | (c)                         |

**Figure S11:** Confusion matrix showing the classification performance of three classifiers of SCM at 62.5 m spatial resolution (a) LDA, (b) KNN and (c) Q-SVM trained with MIG transformed reflectance (SWIR).
